# Supplementary material for: The effect of the position of cross-linkers on the structure and microenvironment of PPh3 moiety in porous organic polymers
Source: Royal Society of Chemistry journal article supplement (doi:10.1039/d0ta12316a), 2021-01-01
Supplement: d0ta12316a1.pdf [file d0ta12316a1.pdf]

## Supporting Information

### **The effect of the position of cross-linkers on the structure and microenvironment of PPh<sub>3</sub> moiety in porous organic polymers**

*Guangjun Ji,<sup>abc</sup> Cunyao Li,<sup>ab</sup> Dong Xiao,<sup>d</sup> Guoqing Wang,<sup>ac</sup> Zhao Sun,<sup>ac</sup> Miao Jiang,<sup>a</sup> Guangjin Hou,<sup>\*d</sup> Li Yan,<sup>\*a</sup> and Yunjie Ding<sup>\*ad</sup>*

<sup>a</sup>Dalian National Laboratory for Clean Energy, Dalian Institute of Chemical Physics, Chinese Academy of Sciences, Dalian, 116023, P. R. China  
E-mail: yanli@dicp.ac.cn; [dyl@dicp.ac.cn](mailto:dyl@dicp.ac.cn).

<sup>b</sup>These authors contributed equally to this work.

<sup>c</sup>University of Chinese Academy of Sciences, Beijing 100039, P. R. China

<sup>d</sup>State Key Laboratory of catalysis, Dalian Institute of Chemical Physics, Chinese Academy of Sciences, Dalian, 116023, P. R. China  
E-mail: ghou@dicp.ac.cn.

---

## 1. Experimental Procedures

### 1.1 Characterizations

Nitrogen sorption isotherms at the temperature of liquid nitrogen were performed on a Quantachrome Autosorb-1 system. The samples were degassed for 12 h at 393 K before test. The specific surface areas were calculated from the adsorption data using Brunauer–Emmett–Teller (BET) methods. The pore size distribution curves were obtained from the adsorption branches using the non-local density functional theory (NLDFT) method.

Thermogravimetric analysis (TGA) was carried out using a thermal analyzer (NETZSCH STA 449 F3), the samples were heated at a rate of 10 K min<sup>-1</sup> from 313 K to 973 K under a nitrogen atmosphere.

Transmission electron microscopy (TEM) was performed using a JEM-2100 with an accelerating voltage of 200 kV. Scanning electron microscopy (SEM) was performed using a JSM-7800 F.

Solid-state <sup>31</sup>P MAS NMR experiments were recorded on a VARIAN Infinity plus spectrometer equipped with a 2.5 mm probe at a frequency of 161.8 MHz. The experiments were recorded under a magic angle spinning rate of 10 kHz and a delay of 3.0 s. Solid-state <sup>31</sup>P NMR chemical shifts were referenced to 85% H<sub>3</sub>PO<sub>4</sub>. <sup>13</sup>C MAS NMR spectra were obtained under a magic angle spinning rate of 6 kHz.

XPS was conducted using a Thermo Scientific instrument and the spectrometer binding energy was calibrated through the reference C 1s (284.6 eV).

The FT-IR facility for characterizing the catalytic performance of Rh/3vPPh<sub>3</sub>-POLs in hydroformylation reactions consisted of an in-situ cell. The gaseous feeds, recirculating cooling water system, temperature controller and vacuum pump were connected to the in-situ cell. In situ FT-IR spectra were collected on a Fourier transform infrared spectrometer (Thermo Scientific Nicolet iS50) equipped with an in-situ cell accessory for testing all the samples. The MCT/A was used as detector. All spectra were collected with a resolution of 4 cm<sup>-1</sup> and accumulation of 32 scans. The ZnSe windows were installed in separate stainless-steel housings. As a typical run, the sample (About 10 mg) was pressed into sample vessel (diameter: 13 mm) and then loaded into the in-situ cell. Then the in-situ cell was sealed and purged with nitrogen for 30 min. Later, switch on the recirculating cooling water supply and regulate the temperature controller to 383 K. The

---

background spectrum was collected after heat to 383 K for 60 min in a flow of N<sub>2</sub>. Subsequently, a syngas (CO/H<sub>2</sub> = 1:1, 0.1 MPa) was purged into the in-situ cell for 60 min. After 60 min of adsorption, the cell was purged under N<sub>2</sub>. The real-time FTIR spectrum data was collected every 5 min until the spectrogram was unchanged.

Rh K-edge X-ray absorption fine structure (EXAFS and XANES) spectra of the prepared samples were obtained at the BL14W1 beamline of SSRF, SINAP (Shanghai, China) with the use of a Si (311) crystal monochromator. The storage ring was operated at 3.5 GeV with injection currents of 200 mA. Pd foil was used as standard sample, and the X-ray absorption spectra were measured in the transmission mode. All spectra of the prepared Rh/3vPPh<sub>3</sub>-POLs were tested in the fluorescence mode. The raw data were energy-calibrated at 23220 eV, first inflection point, background-corrected, and normalized using the IFEFFIT software. Fourier transformation of the EXAFS data was applied to the  $k^3$ -weighted functions. For the curve-fitting analysis, Rh-C and Rh-P path parameters were obtained from the ab initio multiple scattering codes FFEF6.

Inductively coupled plasma (ICP) was measured on an ICPS-8100 apparatus.

## 2. Supporting Tables

**Table S1** Hydroformylation of 1-octene using different samples

| Samples                                        | Conversion (%) | Aldehydes selectivity (%) | Iso-alkenes selectivity (%) | Alkane selectivity (%) | l/b ratio |
|------------------------------------------------|----------------|---------------------------|-----------------------------|------------------------|-----------|
| Rh(CO) <sub>2</sub> (acac) <sup>a)</sup>       | 99             | 8.5                       | 74.7                        | 16.8                   | 0.6       |
| Rh- <i>p</i> -3vPPh <sub>3</sub> <sup>b)</sup> | 99             | 89.0                      | 9.7                         | 1.3                    | 2.9       |
| Rh- <i>m</i> -3vPPh <sub>3</sub> <sup>c)</sup> | 98             | 93.1                      | 6.2                         | 0.7                    | 4.0       |
| Rh- <i>o</i> -3vPPh <sub>3</sub> <sup>d)</sup> | 99             | 92.8                      | 6.9                         | 0.3                    | 4.9       |
| Rh/ <i>p</i> -3vPPh <sub>3</sub> -POL          | 98             | 65.5                      | 21.7                        | 12.8                   | 3.0       |
| Rh/ <i>m</i> -3vPPh <sub>3</sub> -POL          | 99             | 88.6                      | 10.4                        | 1.0                    | 10.1      |
| Rh/ <i>o</i> -3vPPh <sub>3</sub> -POL          | 99             | 47.1                      | 49.8                        | 3.1                    | 2.3       |

Reaction conditions: 0.060 g catalyst (Rh loading at 0.25 %), S/C=6000, toluene (5.0 g), 383 K, 1 MPa for 12 h. Syngas: CO:H<sub>2</sub>=1:1. <sup>a)</sup> 0.95 mg Rh(CO)<sub>2</sub>(acac); <sup>b)</sup> 0.95 mg Rh(CO)<sub>2</sub>(acac)+59.62 mg of *p*-3vPPh<sub>3</sub>, <sup>c)</sup> 0.95 mg Rh(CO)<sub>2</sub>(acac)+59.62 mg of *m*-3vPPh<sub>3</sub>, S/C=6000. <sup>d)</sup> 0.95 mg Rh(CO)<sub>2</sub>(acac)+59.62 mg of *o*-3vPPh<sub>3</sub>, S/C=6000.

**Table S2** The influence of syngas pressure on hydroformylation of 1-octene by Rh/*m*-3vPPh<sub>3</sub>-POL

| Pressure<br>(MPa) | Conversion<br>(%) | Aldehydes selectivity<br>(%) | Iso-alkenes selectivity<br>(%) | Alkane selectivity<br>(%) | l/b ratio |
|-------------------|-------------------|------------------------------|--------------------------------|---------------------------|-----------|
| 0.5               | 92                | 83.2                         | 13.7                           | 3.1                       | 15.7      |
| 1.0               | 99                | 88.6                         | 10.4                           | 1.0                       | 10.1      |
| 1.5               | 95                | 89.5                         | 7.6                            | 2.9                       | 10.0      |
| 2.0               | 94                | 90.9                         | 6.7                            | 2.4                       | 8.1       |

Reaction conditions: 0.060 g Rh/*m*-3vPPh<sub>3</sub>-POL catalyst (Rh loading at 0.25%), S/C=6000, toluene (5.0 g), 383 K for 12 h. Syngas: CO:H<sub>2</sub>=1:1.

**Table S3** The influence of temperature on hydroformylation of 1-octene by Rh/*m*-3vPPh<sub>3</sub>-POL catalyst

| Temperature<br>(K) | Conversion<br>(%) | Aldehydes selectivity<br>(%) | Iso-alkenes selectivity<br>(%) | Alkane selectivity<br>(%) | l/b ratio |
|--------------------|-------------------|------------------------------|--------------------------------|---------------------------|-----------|
| 373                | 78                | 92.5                         | 5.3                            | 2.2                       | 9.0       |
| 383                | 99                | 88.6                         | 10.4                           | 1.0                       | 10.1      |
| 393                | 97                | 82.8                         | 13.6                           | 3.6                       | 13.3      |
| 403                | 98                | 71.7                         | 22.1                           | 6.2                       | 11.5      |

Reaction conditions: 0.060 g Rh/*m*-3vPPh<sub>3</sub>-POL catalyst (Rh loading at 0.25%), S/C=6000, toluene (5.0 g), 1MPa for 12 h. Syngas: CO:H<sub>2</sub>=1:1.

---

**Table S4** Turnover frequency (TOF) of Rh/*m*-3vPPh<sub>3</sub>-POL

---

| Conversion<br>(%) | Aldehydes selectivity<br>(%) | iso-alkenes selectivity<br>(%) | Alkane selectivity<br>(%) | l/b  | TOF (h <sup>-1</sup> ) |
|-------------------|------------------------------|--------------------------------|---------------------------|------|------------------------|
| 24                | 87.4                         | 4.1                            | 8.5                       | 13.3 | 2221.6                 |

---

Reaction conditions: 0.060 g catalyst (Rh loading at 0.25 %), S/C=6000, toluene (5.0 g), 383 K, 1 MPa for 40 min. Syngas: CO:H<sub>2</sub>=1:1.

### 3. Supporting Figures

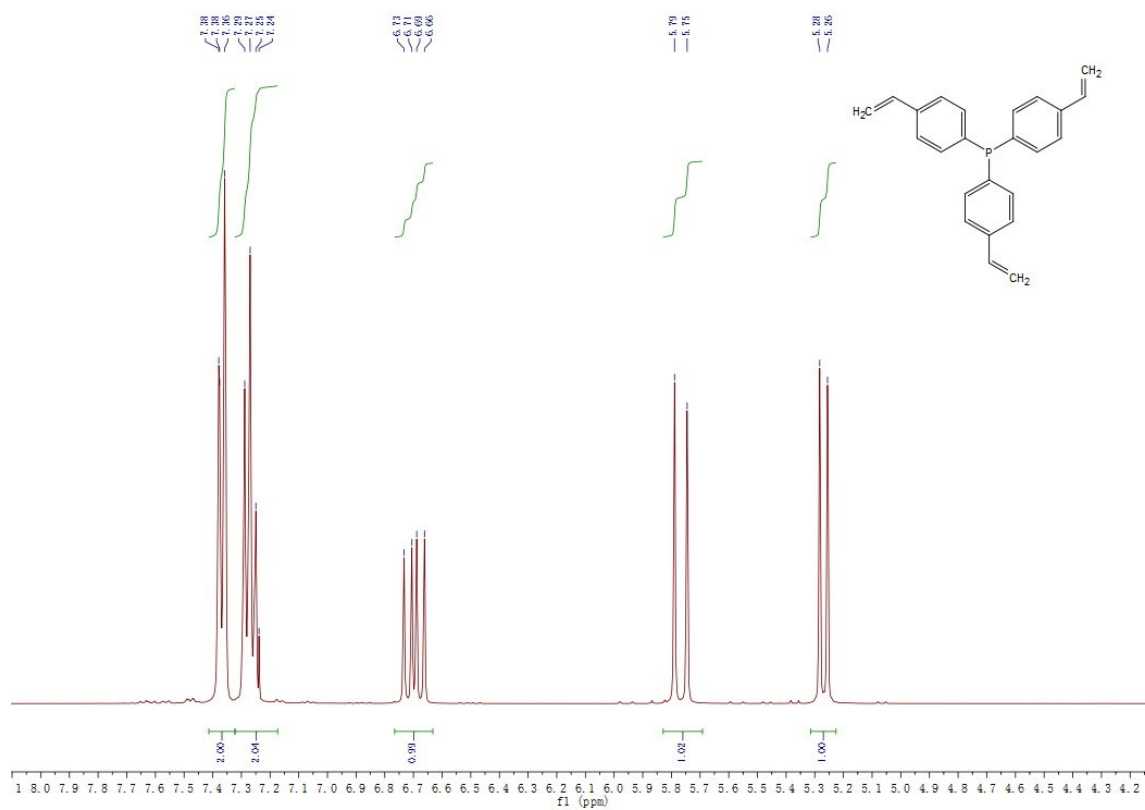

<sup>1</sup>H NMR spectrum of *p*-3vPPH<sub>3</sub>

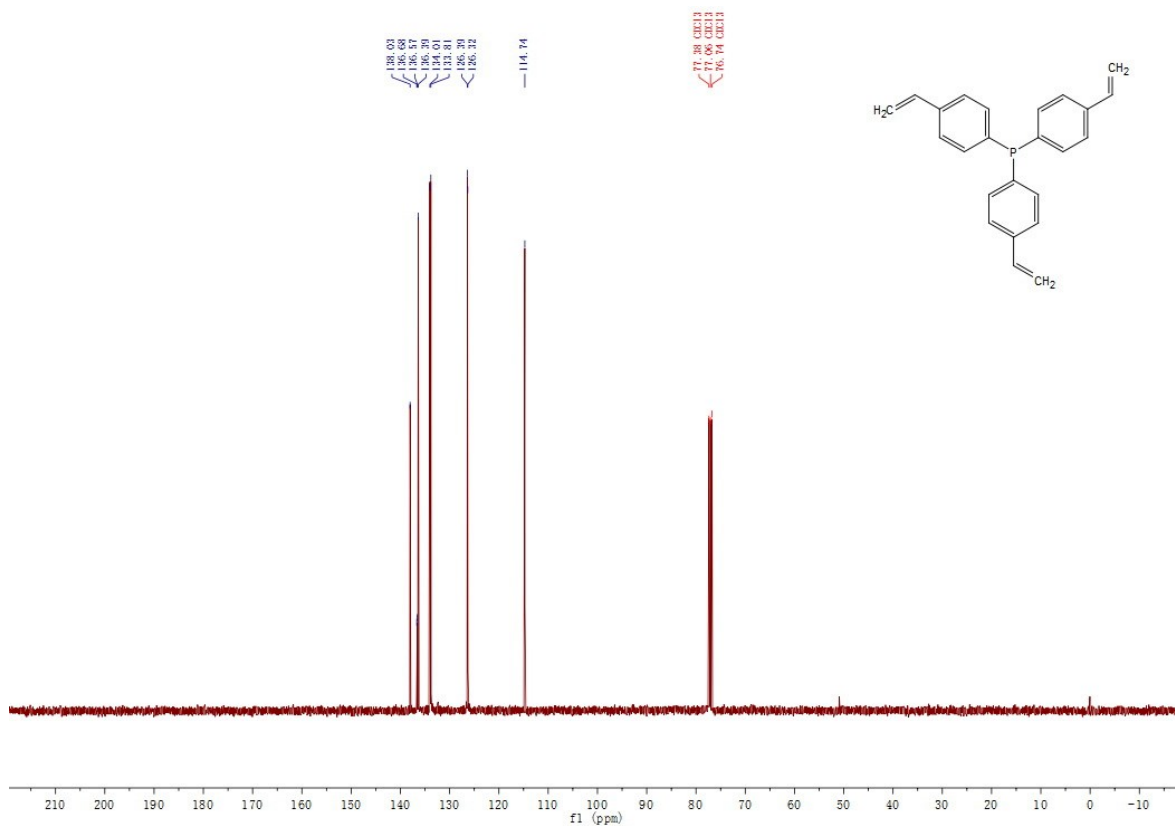

<sup>13</sup>C NMR spectrum of *p*-3vPPH<sub>3</sub>



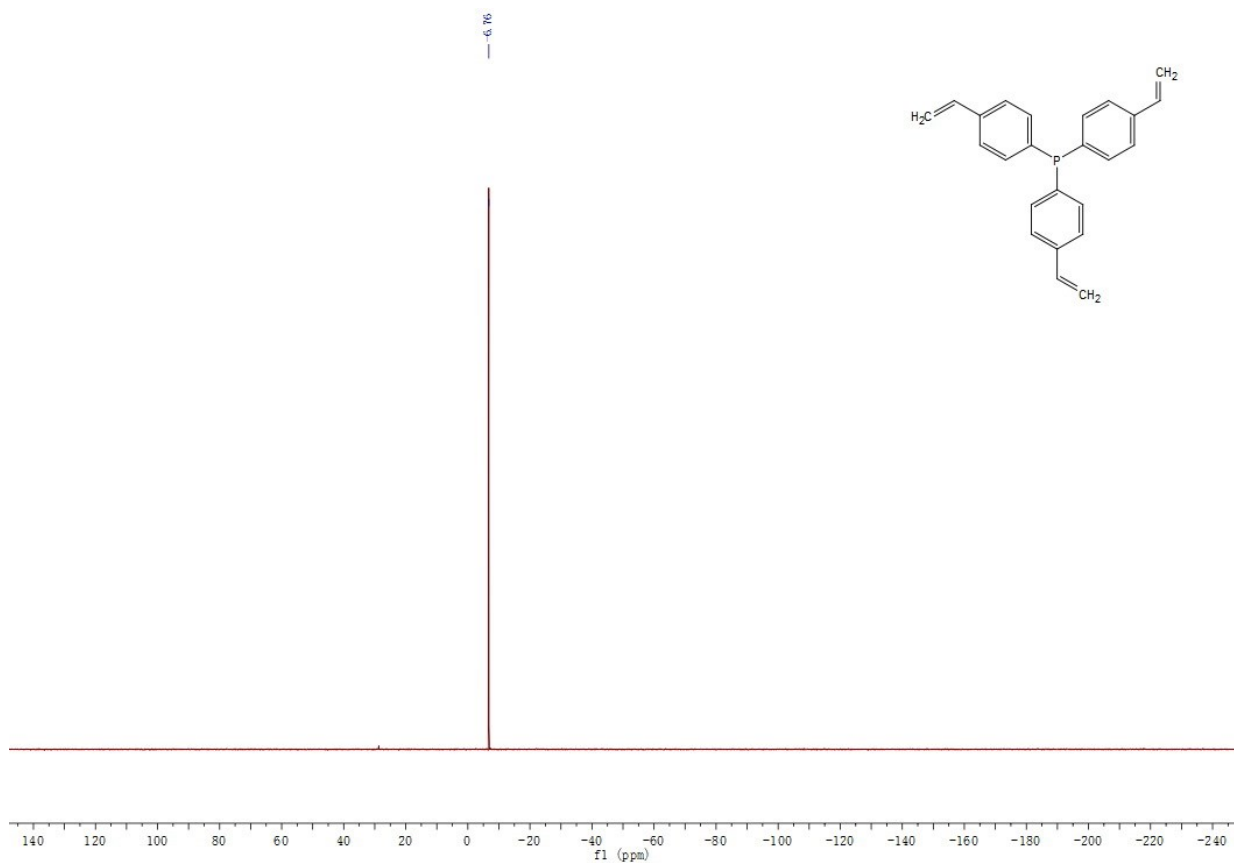

<sup>31</sup>P NMR spectrum of *p*-3vPPh<sub>3</sub>

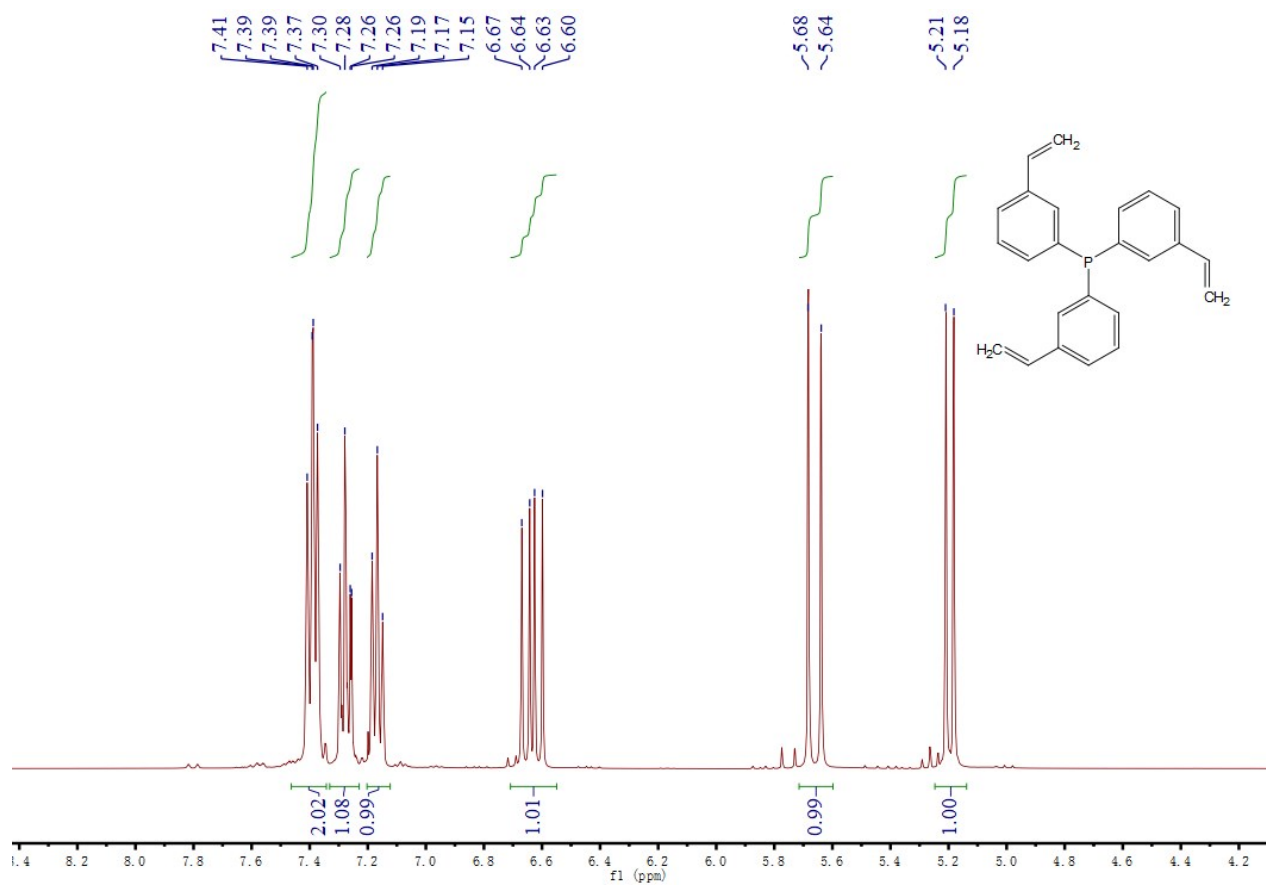

<sup>1</sup>H NMR spectrum of *m*-3vPPh<sub>3</sub>

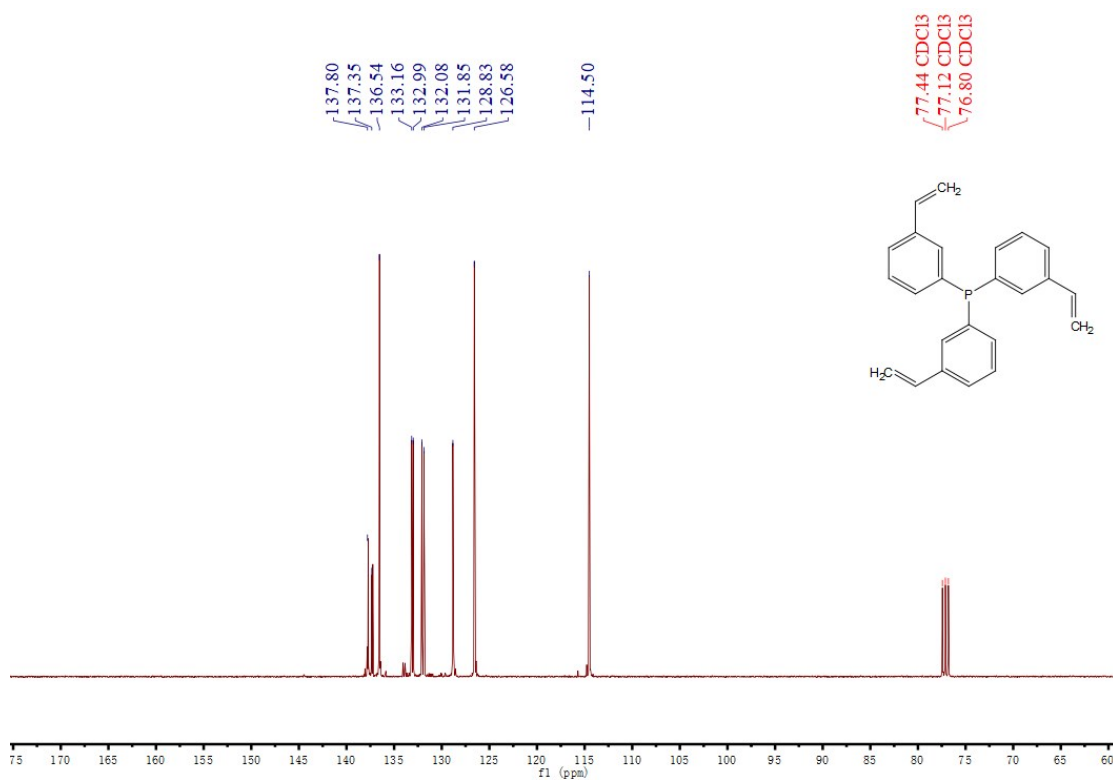

<sup>13</sup>C NMR spectrum of *m*-3vPPh<sub>3</sub>

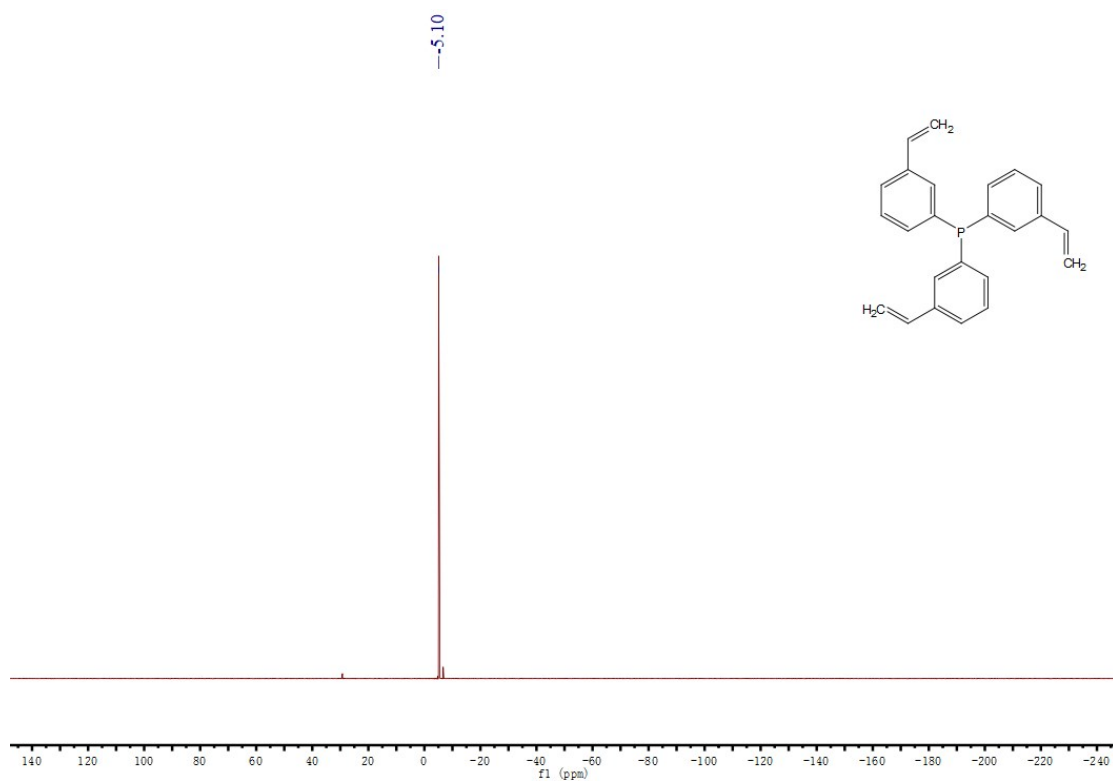

<sup>31</sup>P NMR spectrum of *m*-3vPPh<sub>3</sub>

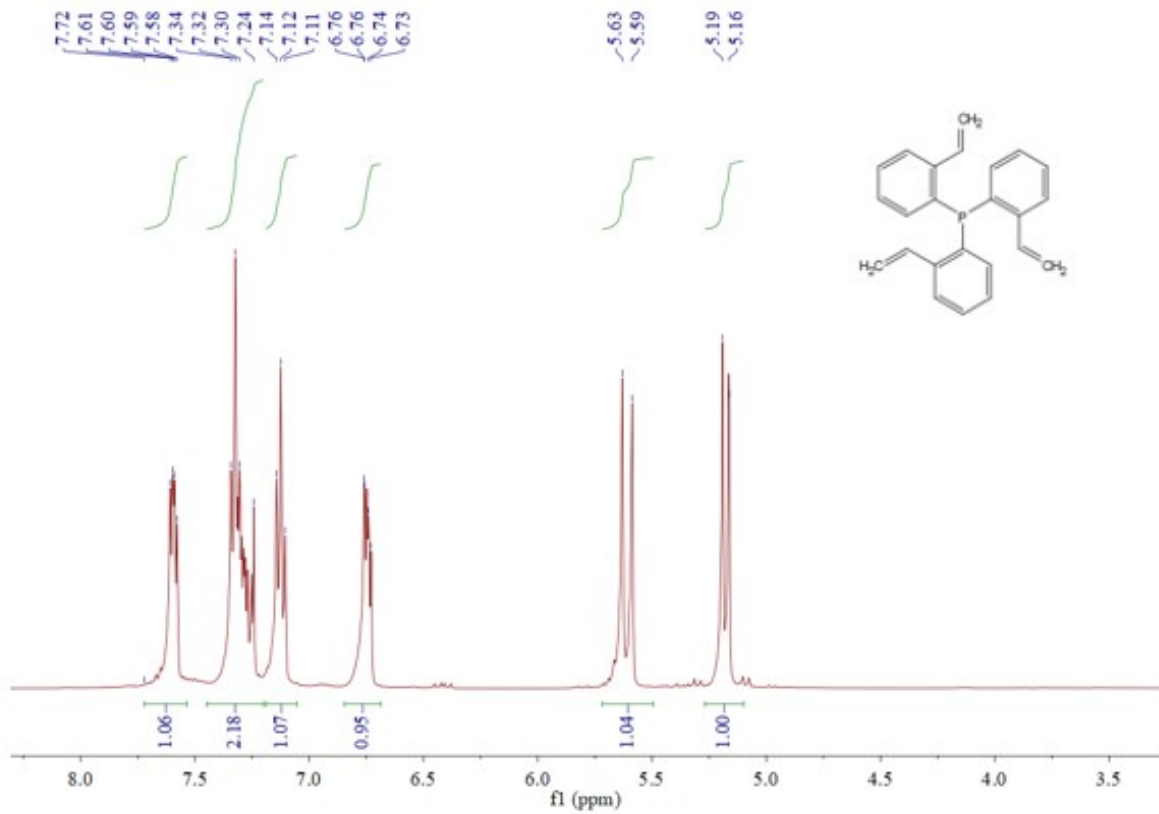

<sup>1</sup>H NMR spectrum of *o*-3vPPh<sub>3</sub>

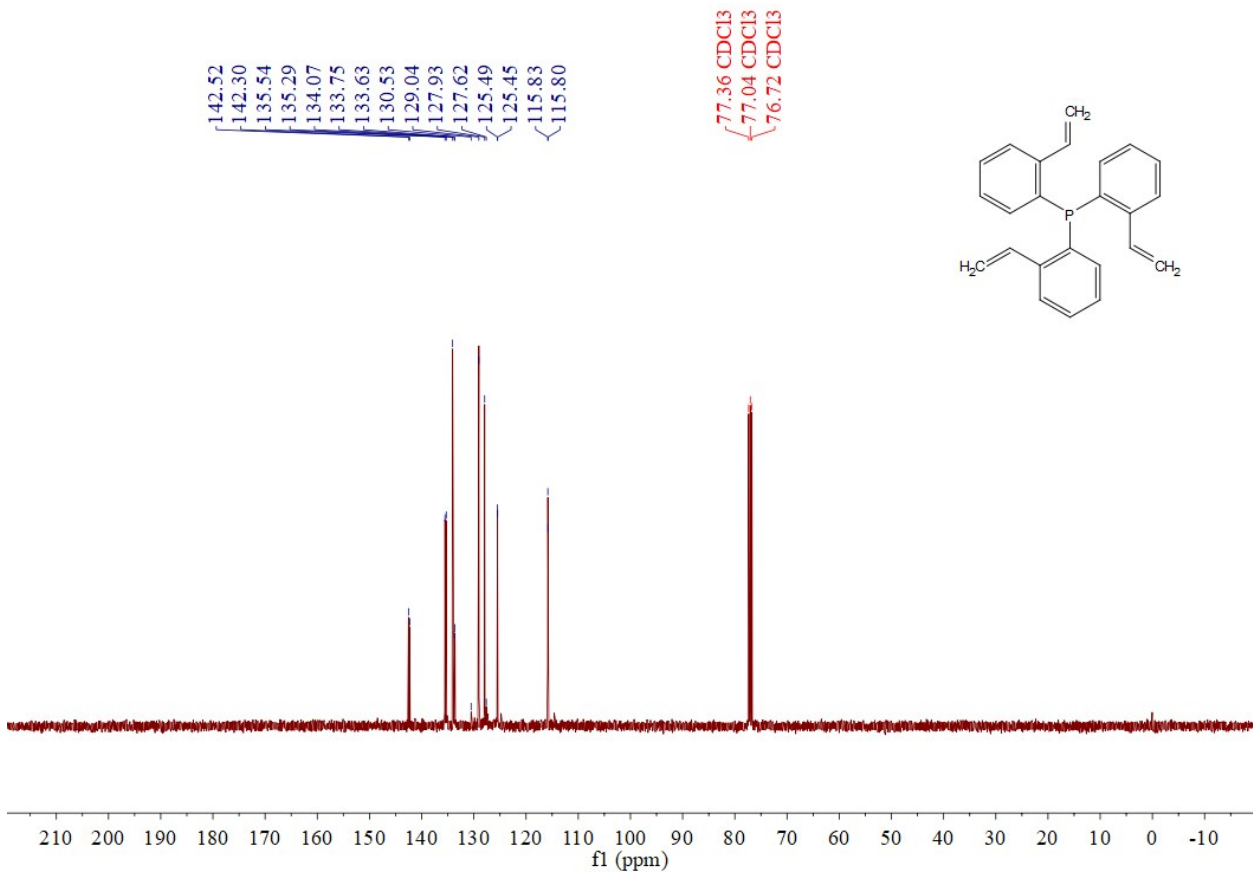

<sup>13</sup>C NMR spectrum of *o*-3vPPh<sub>3</sub>

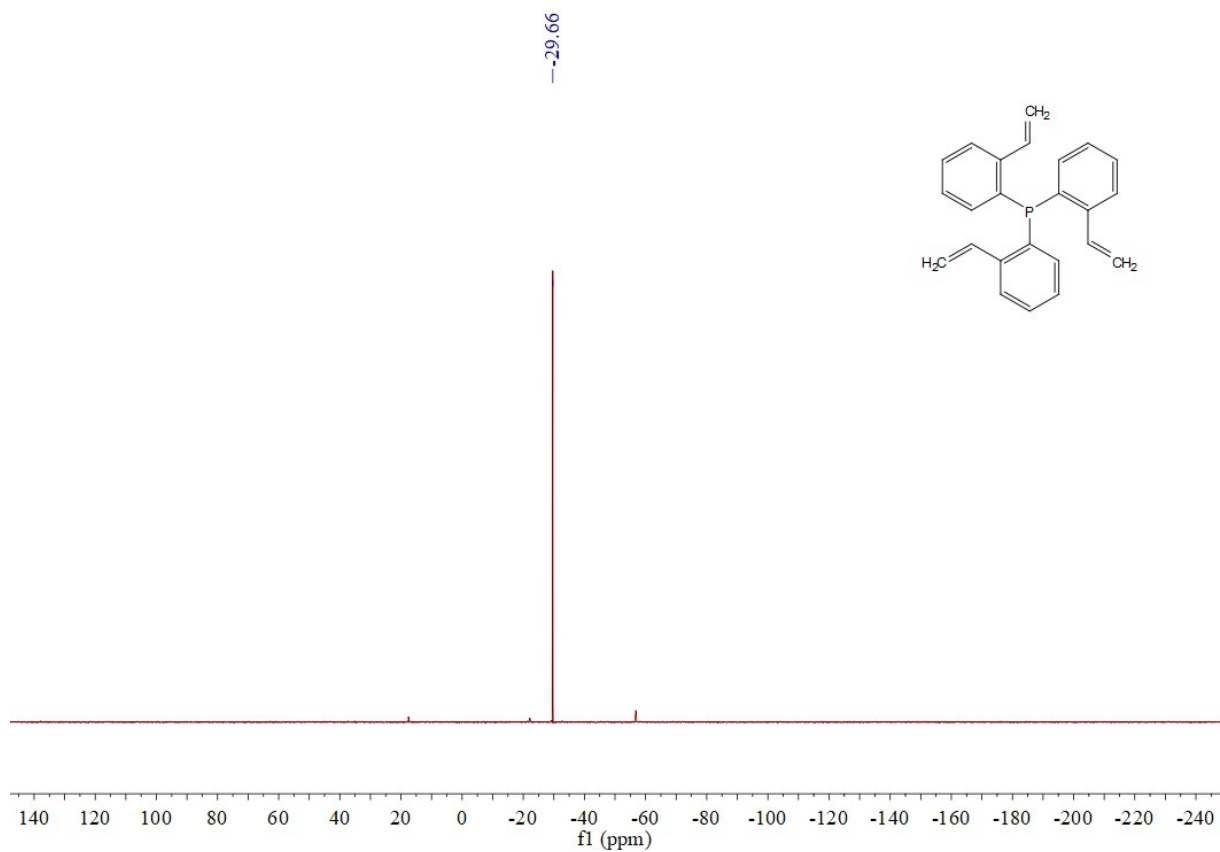

$^{31}\text{P}$  NMR spectrum of *o*-3vPPh<sub>3</sub>

**Fig. S1** NMR spectra of *p*-3vPPh<sub>3</sub>, *m*-3vPPh<sub>3</sub> and *o*-3vPPh<sub>3</sub>

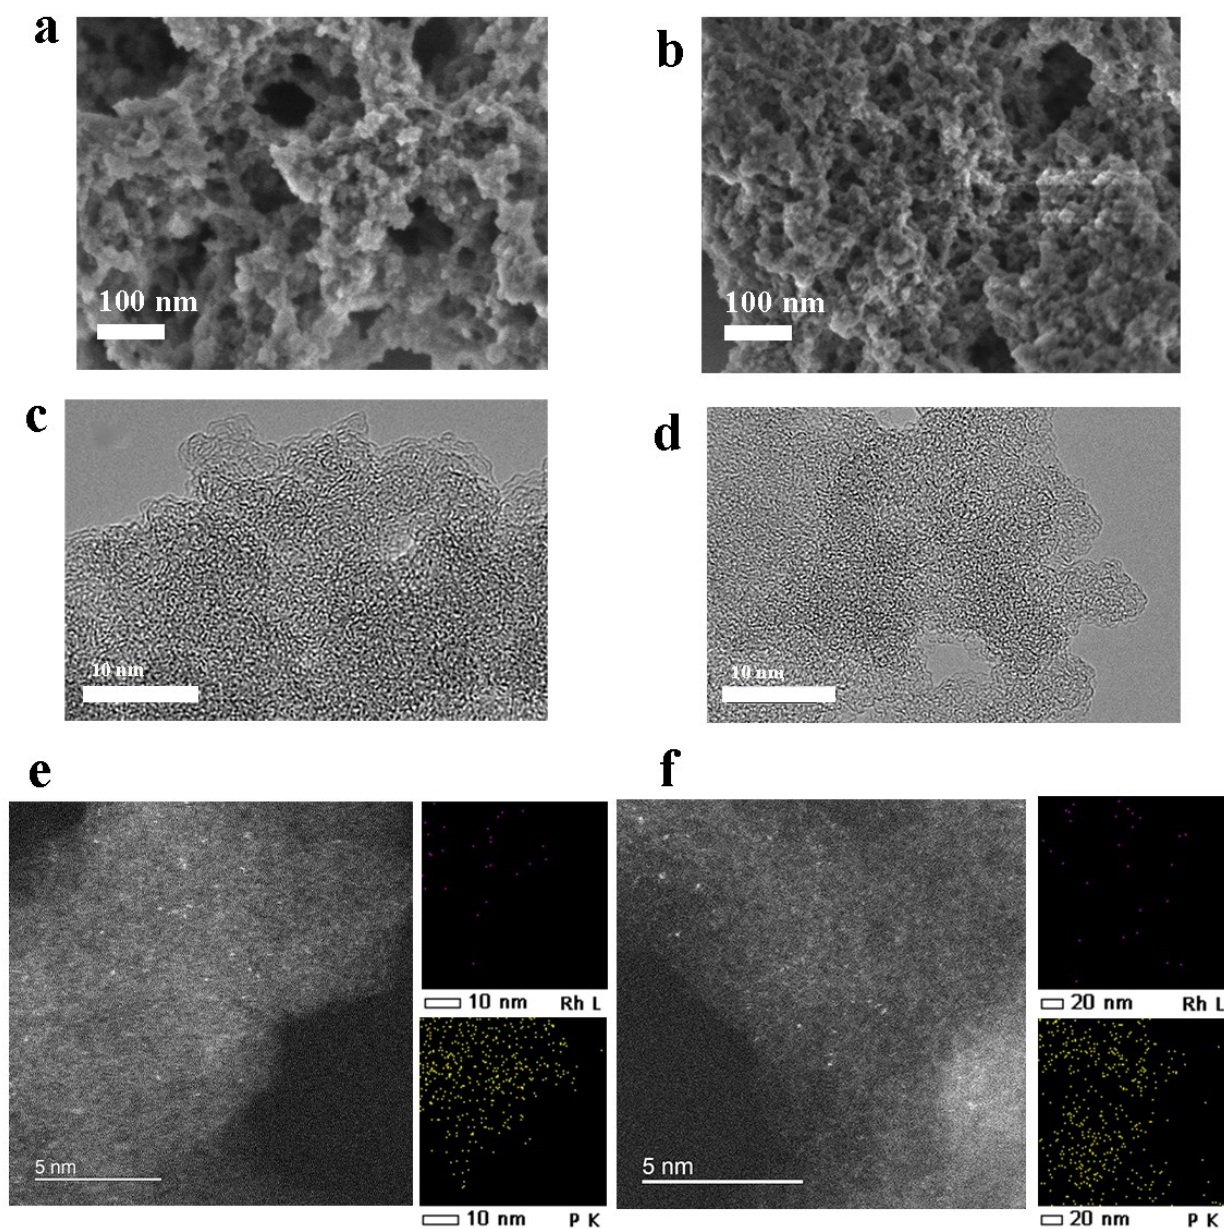

**Fig. S2** (a) The SEM image of Rh/*m*-3vPPh<sub>3</sub>-POL; (b) The SEM image of used Rh/*m*-3vPPh<sub>3</sub>-POL; (c) The TEM image of Rh/*m*-3vPPh<sub>3</sub>-POL; (d) The TEM image of used Rh/*m*-3vPPh<sub>3</sub>-POL; (e) The HADDF-STEM and HADDF-EDS element maps images of Rh/*m*-3vPPh<sub>3</sub>-POL; (f) The HADDF-STEM and HADDF-EDS element maps images of used Rh/*m*-3vPPh<sub>3</sub>-POL.

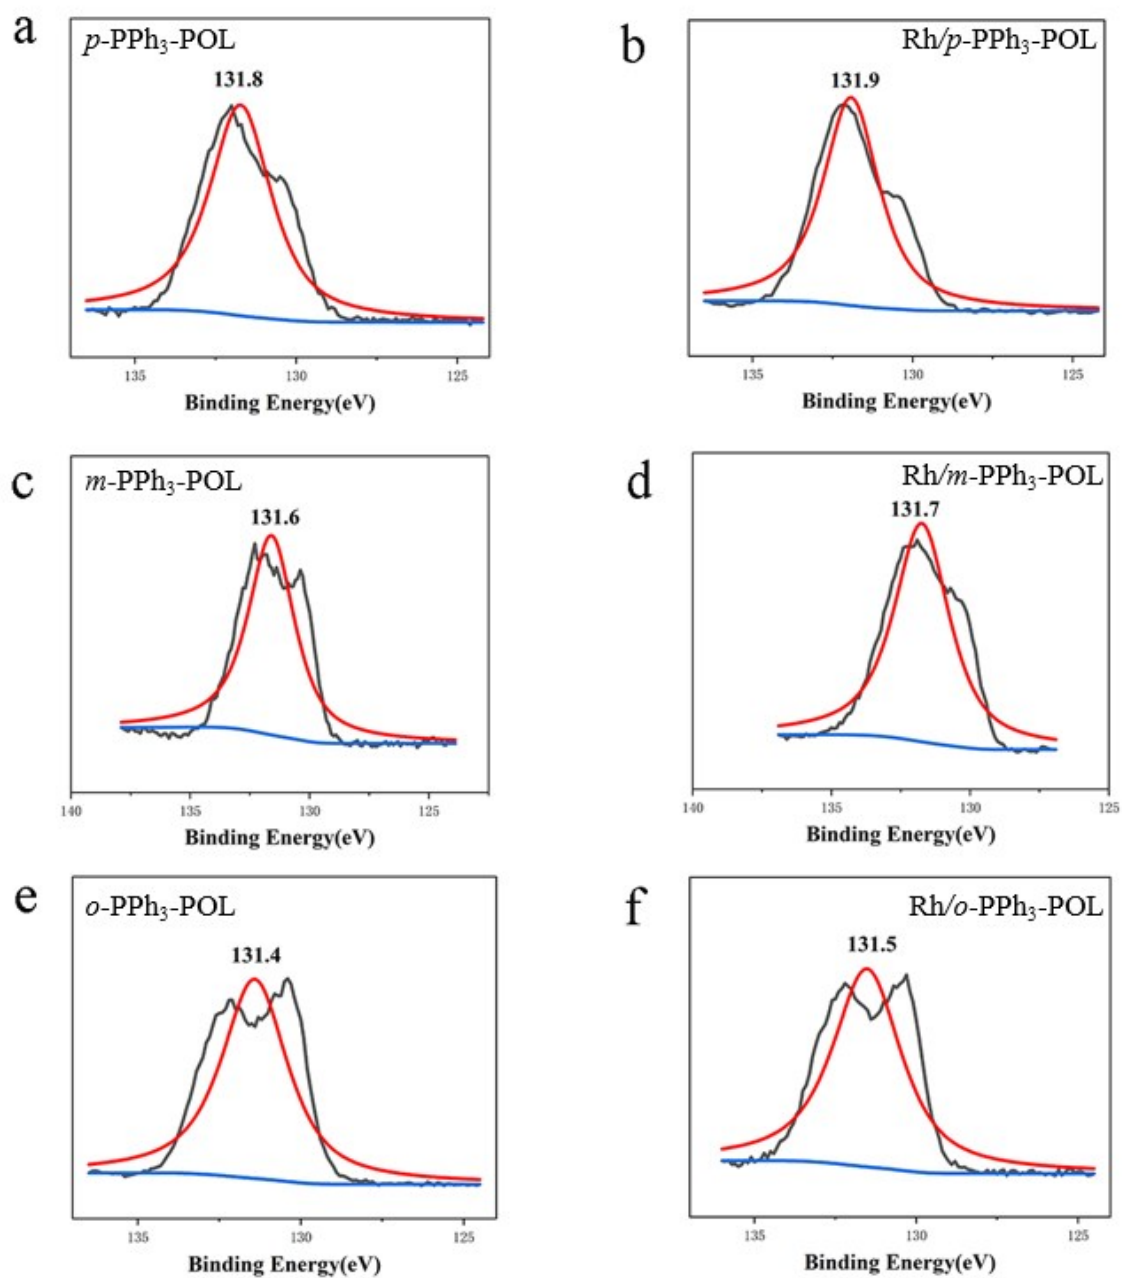

**Fig. S3** The P2p XPS spectra of PPh<sub>3</sub>-POLs and corresponding Rh/PPh<sub>3</sub>-POLs. (a) *p*-3vPPh<sub>3</sub>-POL, (b) 0.25wt% Rh/*p*-3vPPh<sub>3</sub>-POL, (c) *m*-3vPPh<sub>3</sub>-POL, (d) 0.25wt% Rh/*m*-3vPPh<sub>3</sub>-POL, (e) *o*-3vPPh<sub>3</sub>-POL, (f) 0.25wt% Rh/*o*-3vPPh<sub>3</sub>-POL.

## 4. Supporting Scheme

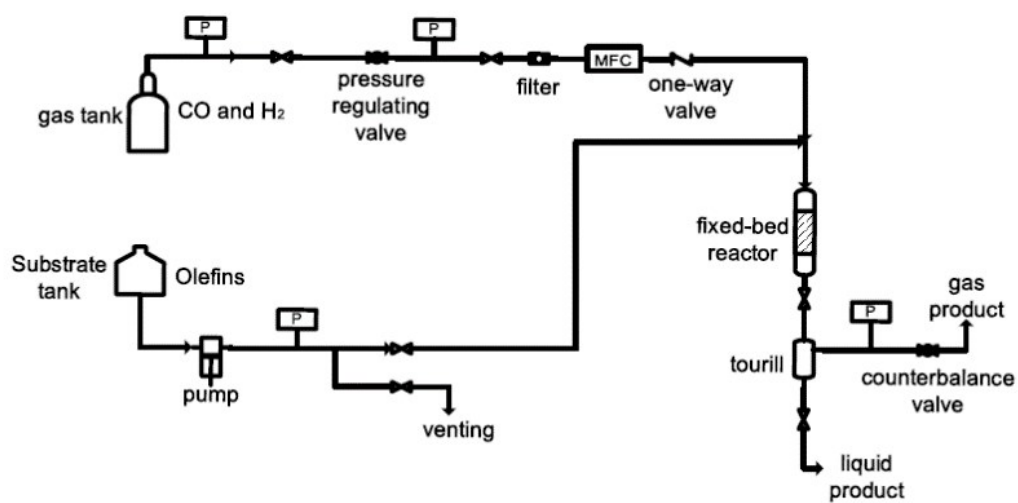

**Scheme S1** Flow chart of hydroformylation of 1-octene in a fixed-bed reactor.
